# Supplementary material
Source: PubMed Central journal article supplement (PMC2912431)
Supplement: NIHMS214068-supplement-1_si_001.pdf [file NIHMS214068-supplement-1_si_001.pdf]

Supplementary Material for  
Mutagenesis of *Klebsiella aerogenes* UreG to Probe Nickel Binding and Stabilization of  
a UreG-UreE Complex

Jodi L. Boer, Soledad Quiroz-Valenzuela, Kimberly L. Anderson, and Robert P.  
Hausinger

1. Carter, E. L., and Hausinger, R. P. (2010) Characterization of *Klebsiella aerogenes* urease accessory protein UreD in fusion with the maltose binding protein, *J. Bacteriol.* 192, 2294-2304.
2. Mulrooney, S. B., Pankratz, H. S., and Hausinger, R. P. (1989) Regulation of gene-expression and cellular-localization of cloned *Klebsiella aerogenes* (*Klebsiella pneumoniae*) urease, *J. Gen. Microbiol.* 135, 1769-1776.
3. Park, I. S., Carr, M. B., and Hausinger, R. P. (1994) In vitro activation of urease apoprotein and role of UreD as a chaperone required for nickel metallocenter assembly, *Proc. Natl. Acad. Sci. U.S.A.* 91, 3233-3237.
4. Park, I. S. (1994) Thesis, in *Microbiology*, Michigan State University, East Lansing, MI.
5. Colpas, G. J., Brayman, T. G., Ming, L.-J., and Hausinger, R. P. (1999) Identification of metal-binding residues in the *Klebsiella aerogenes* urease nickel metallochaperone, UreE, *Biochemistry* 38, 4078-4088.

Table S1: Plasmids and *E. coli* strains used in this study

| Plasmid                                                                                                                                                                                                            | Description                                                                                                                                                           | <i>E. coli</i> strain            | Reference |
|--------------------------------------------------------------------------------------------------------------------------------------------------------------------------------------------------------------------|-----------------------------------------------------------------------------------------------------------------------------------------------------------------------|----------------------------------|-----------|
| pASK-IBA3plus                                                                                                                                                                                                      | Plasmid for creating fusion proteins with a <i>Strep</i> -tag II (WSHPQFEK) at the C-terminus                                                                         |                                  | IBA       |
| pASK-IBA5plus                                                                                                                                                                                                      | Plasmid for creating fusion proteins with a <i>Strep</i> -tag II at the N-terminus                                                                                    |                                  | IBA       |
| pEC007                                                                                                                                                                                                             | Modified pACT3 to encode UreE                                                                                                                                         | DH5 $\alpha$                     | (1)       |
| pIBA3+G                                                                                                                                                                                                            | Modified pASK-IBA3plus to encode UreG <sub>Str</sub>                                                                                                                  | DH5 $\alpha$<br>or<br>BL21 (DE3) | This work |
| pIBA5+G                                                                                                                                                                                                            | Modified pASK-IBA5plus to encode UreG <sub>Str</sub>                                                                                                                  | DH5 $\alpha$<br>or<br>BL21 (DE3) | This work |
| pIBA3+GK20A,<br>pIBA3+GE25A,<br>pIBA3+GC28A,<br>pIBA3+GD33A,<br>pIBA3+GD49A,<br>pIBA3+GE68A,<br>pIBA3+GC72A,<br>pIBA3+GH74A,<br>pIBA3+GD80A,<br>pIBA3+GS111A,<br>pIBA3+GS115A,<br>pIBA3+GD120A and<br>pIBA3+GD127A | Modified pIBA3+G to encode the K20A, E25A, C28A, D33A, D49A, E68A, C72A, H74A, D80A, S111A, S115A, D120A and D127A variants of UreG <sub>Str</sub>                    | BL21 (DE3)                       | This work |
| pKAU17                                                                                                                                                                                                             | <i>K. aerogenes</i> urease gene cluster in pUC8                                                                                                                       |                                  | (2)       |
| pKAUD2                                                                                                                                                                                                             | pKAU17 modified to overexpress <i>ureD</i>                                                                                                                            |                                  | (3)       |
| pKAUG-1                                                                                                                                                                                                            | Modified pKAUD2 containing only <i>K. aerogenes ureG</i> . The plasmid was constructed by isolating a <i>KspI-EcoRI</i> fragment, forming blunt ends, and religating. | BL21 (DE3)                       | (4)       |
| pKK17                                                                                                                                                                                                              | <i>K. aerogenes</i>                                                                                                                                                   | DH5 $\alpha$                     | (5)       |

---

|                                                                                                                                              |                                                                                                                                                                        |      |           |
|----------------------------------------------------------------------------------------------------------------------------------------------|------------------------------------------------------------------------------------------------------------------------------------------------------------------------|------|-----------|
|                                                                                                                                              | <i>ureDABCEFG</i> gene cluster<br>inserted into pKK223-3                                                                                                               |      |           |
| pKKG                                                                                                                                         | Modified pKK17 encoding<br>UreG <sub>Str</sub>                                                                                                                         | DH5α | This work |
| pKKGK20A, pKKGE25A,<br>pKKGC28A, pKKGD33A,<br>pKKGD49A, pKKGE68A,<br>pKKGC72A, pKKGH74A,<br>pKKGD80A, pKKGS111A,<br>pKKGS115A, and pKKGD127A | Modified pKKG encoding<br>the K20A, E25A, C28A,<br>D33A, D49A, E68A,<br>C72A, H74A, H74C,<br>H74N, D80A, S111A,<br>S115A, and D127A<br>variants of UreG <sub>Str</sub> | DH5α | This work |

---

TABLE S2: Oligonucleotides used to generate UreG mutations

| Purpose             | Sequence                                                                                                                                                           |
|---------------------|--------------------------------------------------------------------------------------------------------------------------------------------------------------------|
| UreG mutation E25A  | 5' GTA AAA CCG CTC TGC TGG <u>CGG</u> CGC TGT GTA AAG<br>CGA TG 3'<br>5' CAT CGC TTT ACA CAG CGC <u>CGC</u> CAG CAG AGC GGT<br>TTT<br>AC 3'                        |
| UreG mutation C28A  | 5' CT CTG CTG GAA GCG CTG <u>GCA</u> AAA GCG ATG CGC<br>GAT<br>AC 3'<br>5' GT ATC GCG CAT CGC TTT <u>TGC</u> CAG CGC TTC CAG CAG<br>AG 3'                          |
| UreG mutation D33A  | 5' GTA AAG CGA TGC GCG <u>CGA</u> CCT GGC AGC TGG C 3'<br>5' G CCA GCT GCC <u>AGGTCG</u> CGC GCA TCG CTT TAC 3'                                                    |
| UreG mutation D49A  | 5' - GAC ATC TAT ACC AAA GAA <u>GCG</u> CAG CGC ATC CTC<br>ACC GAA - 3'                                                                                            |
| UreG mutation E68A  | 5' - GAA CGC ATC GTC GGT GTG <u>GCG</u> ACC GGC GGC TGC<br>CCG CAT - 3'                                                                                            |
| UreG mutation C72A  | 5' - GTC GGT GTG GAA ACC GGC GGC <u>GCG</u> CCG CAT ACG<br>GCG ATC CGC GAA - 3'                                                                                    |
| UreG mutation H74A  | 5' - GAA ACC GGC GGC TGC CCG <u>GCA</u> ACG GCG ATC CGC<br>GAA GAT - 3'                                                                                            |
| UreG mutation H74C  | 5' - GAA ACC GGC GGC TGC CCG <u>TGC</u> ACG GCG ATC CGC<br>GAA GAT - 3'                                                                                            |
| UreG mutation H74N  | 5' - GAA ACC GGC GGC TGC CCG <u>AAT</u> ACG GCG ATC CGC<br>GAA GAT - 3'                                                                                            |
| UreG mutation D80A  | 5' - CAT ACG GCG ATC CGC GAA <u>GCG</u> GCC TCA ATG AAC<br>CTC GCC - 3'                                                                                            |
| UreG mutation S111A | 5' - GAA AGC GGC GGC GAT AAC CTG <u>GCC</u> GCC ACC TTC<br>AGC CCG GAG CTG - 3'<br>5' - CAG CTC CGG GCT GAA GGT GGC <u>GGC</u> CAG GTT ATC<br>GCC GCC GCT TTC - 3' |
| UreG mutation S115A | 5' - AAC CTG AGC GCC ACC TTC <u>GCC</u> CCG GAG CTG GCG<br>GAT CTG - 3'<br>5' - CAG ATC CGC CAG CTC CGG <u>GGC</u> GAA GGT GGC GCT<br>CAG GTT - 3'                 |
| UreG mutation D120A | 5' C CGG AGC TGG CGG <u>CGC</u> TGA CCA TCT AC 3'<br>5' GT AGA TGG TCA <u>GCG</u> CCG CCA GCT CCG G 3'                                                             |
| UreG mutation D127A | 5' CA TCT ACG TCA TCG <u>CGG</u> TGG CCG AAG GGG AG 3'<br>5' CT CCC CTT CGG CCA <u>CCG</u> CGA TGA CGT AGA TG 3'                                                   |
